# Supplementary material for: A Novel Low-Cost DIC-Based Residual Stress Measurement Device
Source: MDPI journal article supplement (doi:10.3390/app12147233), 2022-07-18

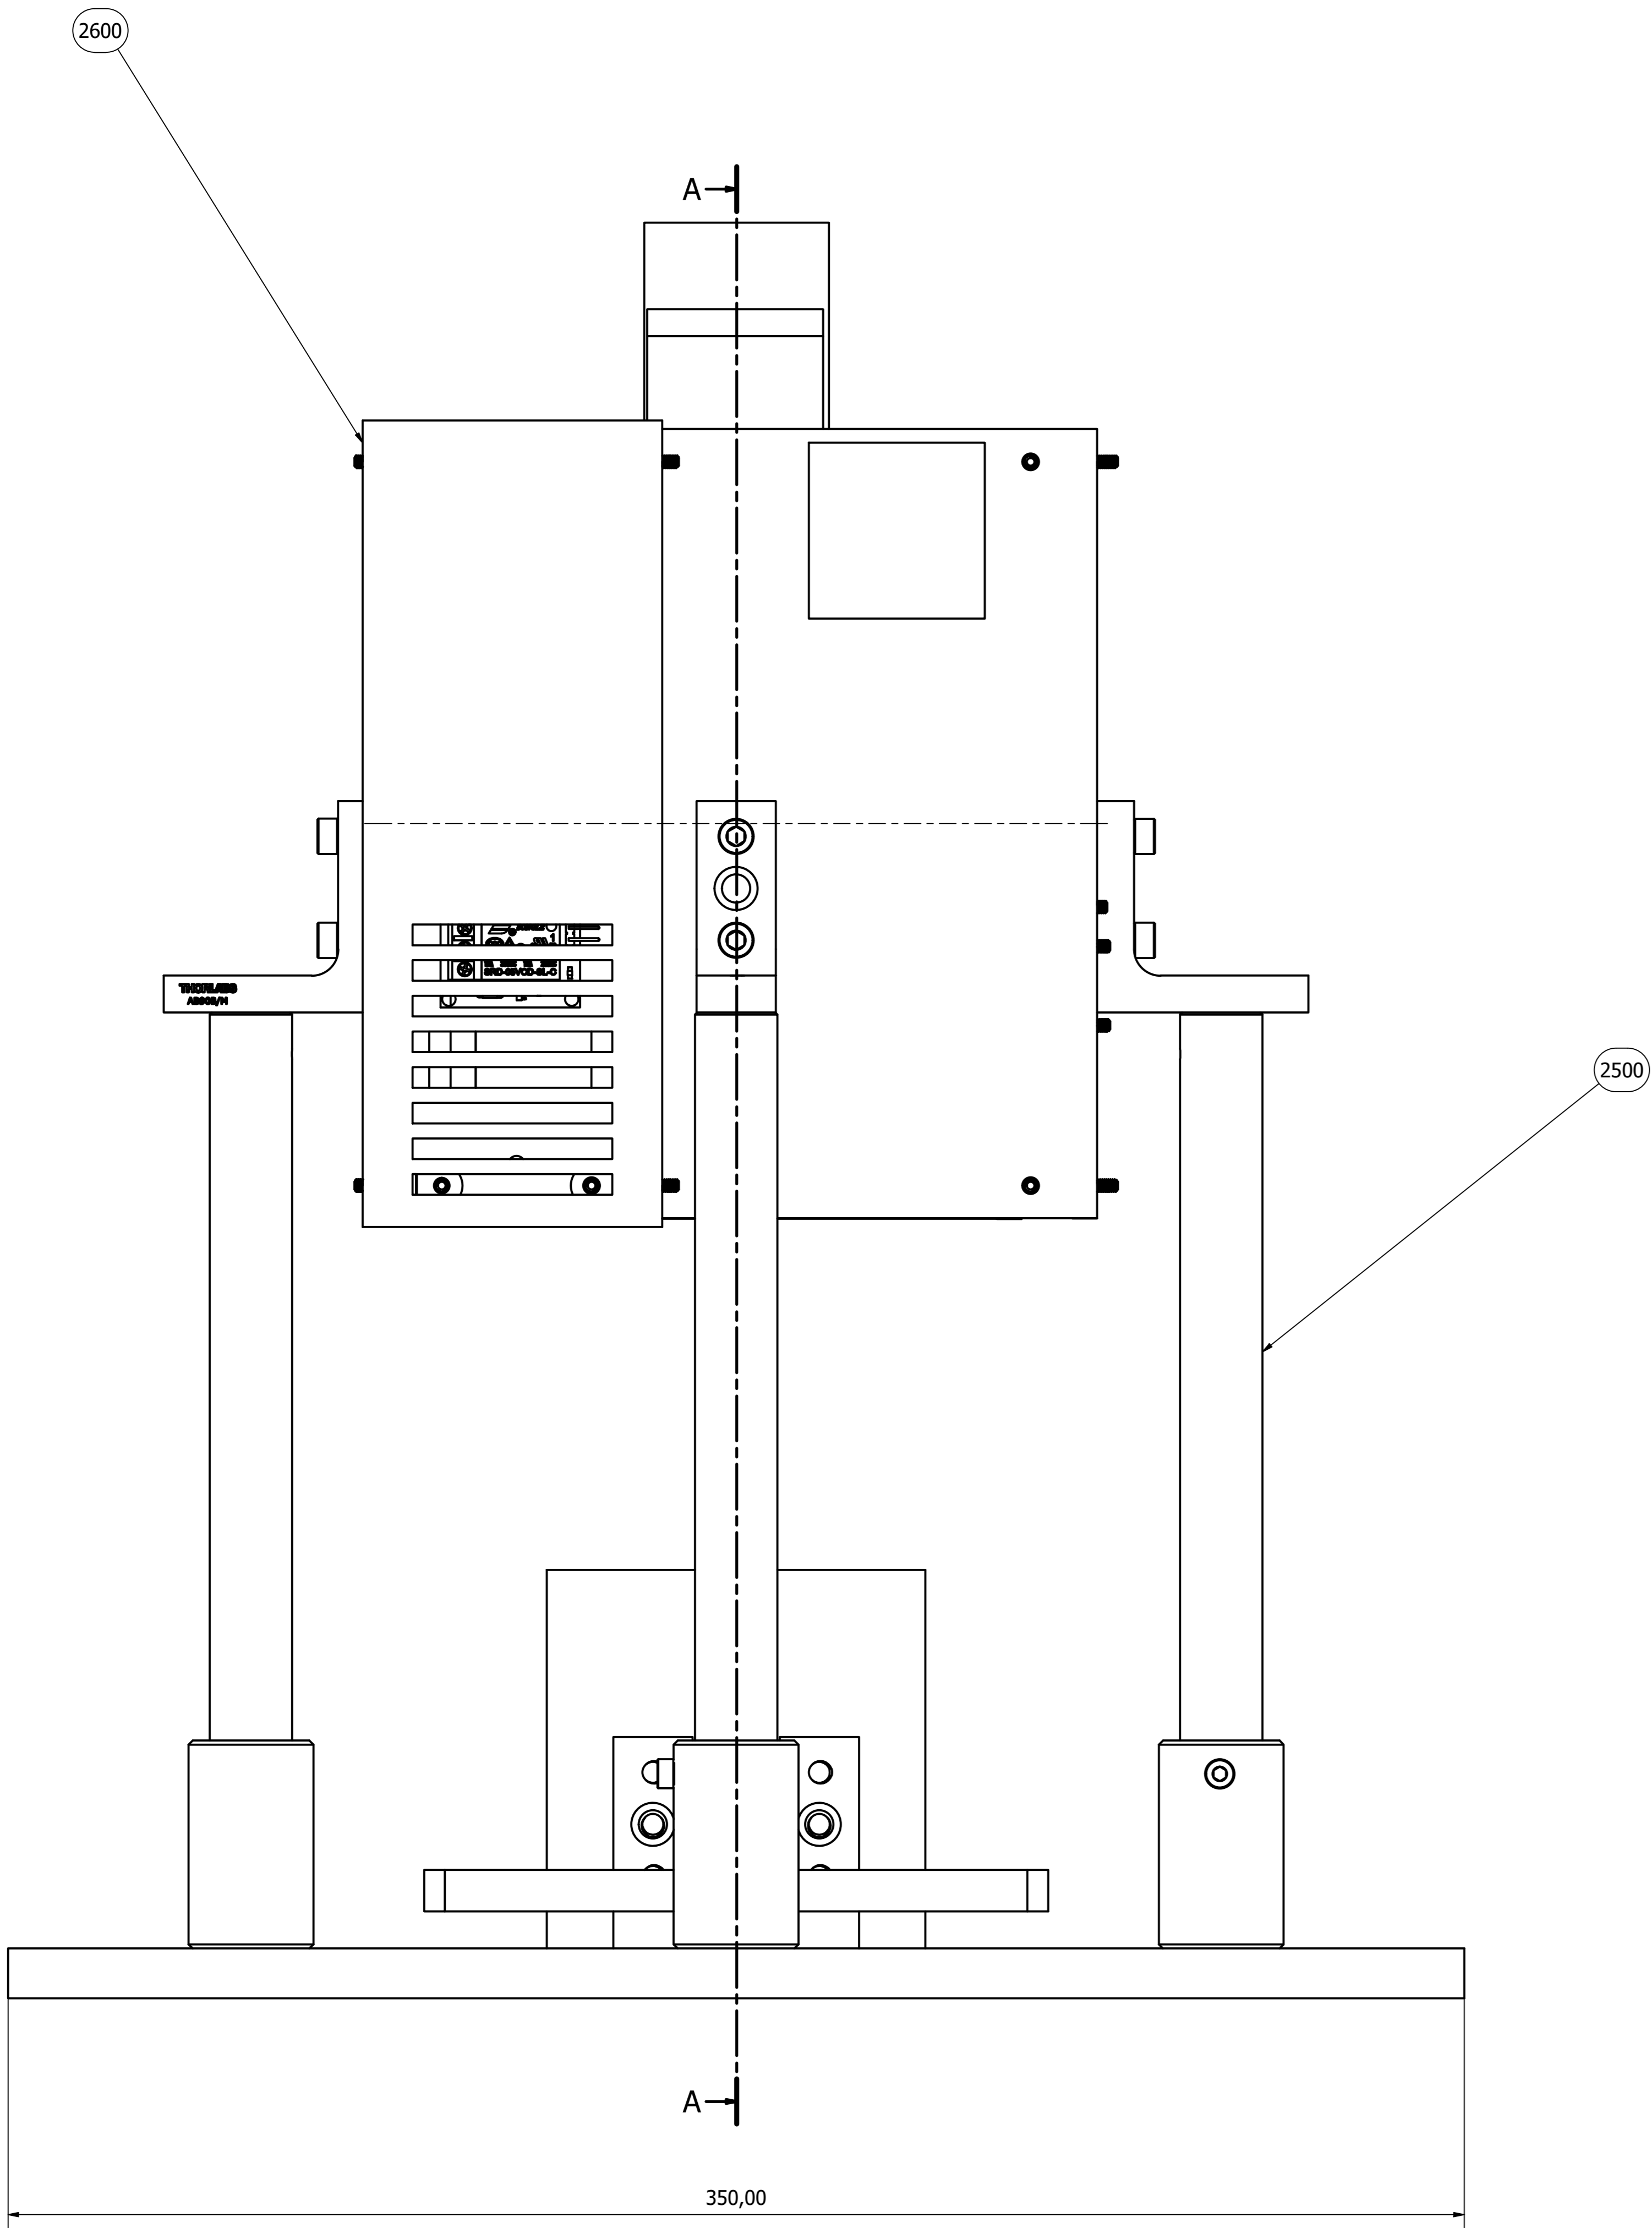

| Parts List |                                      |
|------------|--------------------------------------|
| Part No    | Subassembly Name                     |
| 2100       | Z-Axis Actuation                     |
| 2200       | X-Axis Actuation                     |
| 2300       | Hand Drill                           |
| 2400       | Microscope Imaging Assembly          |
| 2500       | Spacer Assembly                      |
| 2600       | Electronics Box                      |
| 2700       | Custom Experiment Setup              |
| 2800       | Optomechanical Alignment Subassembly |

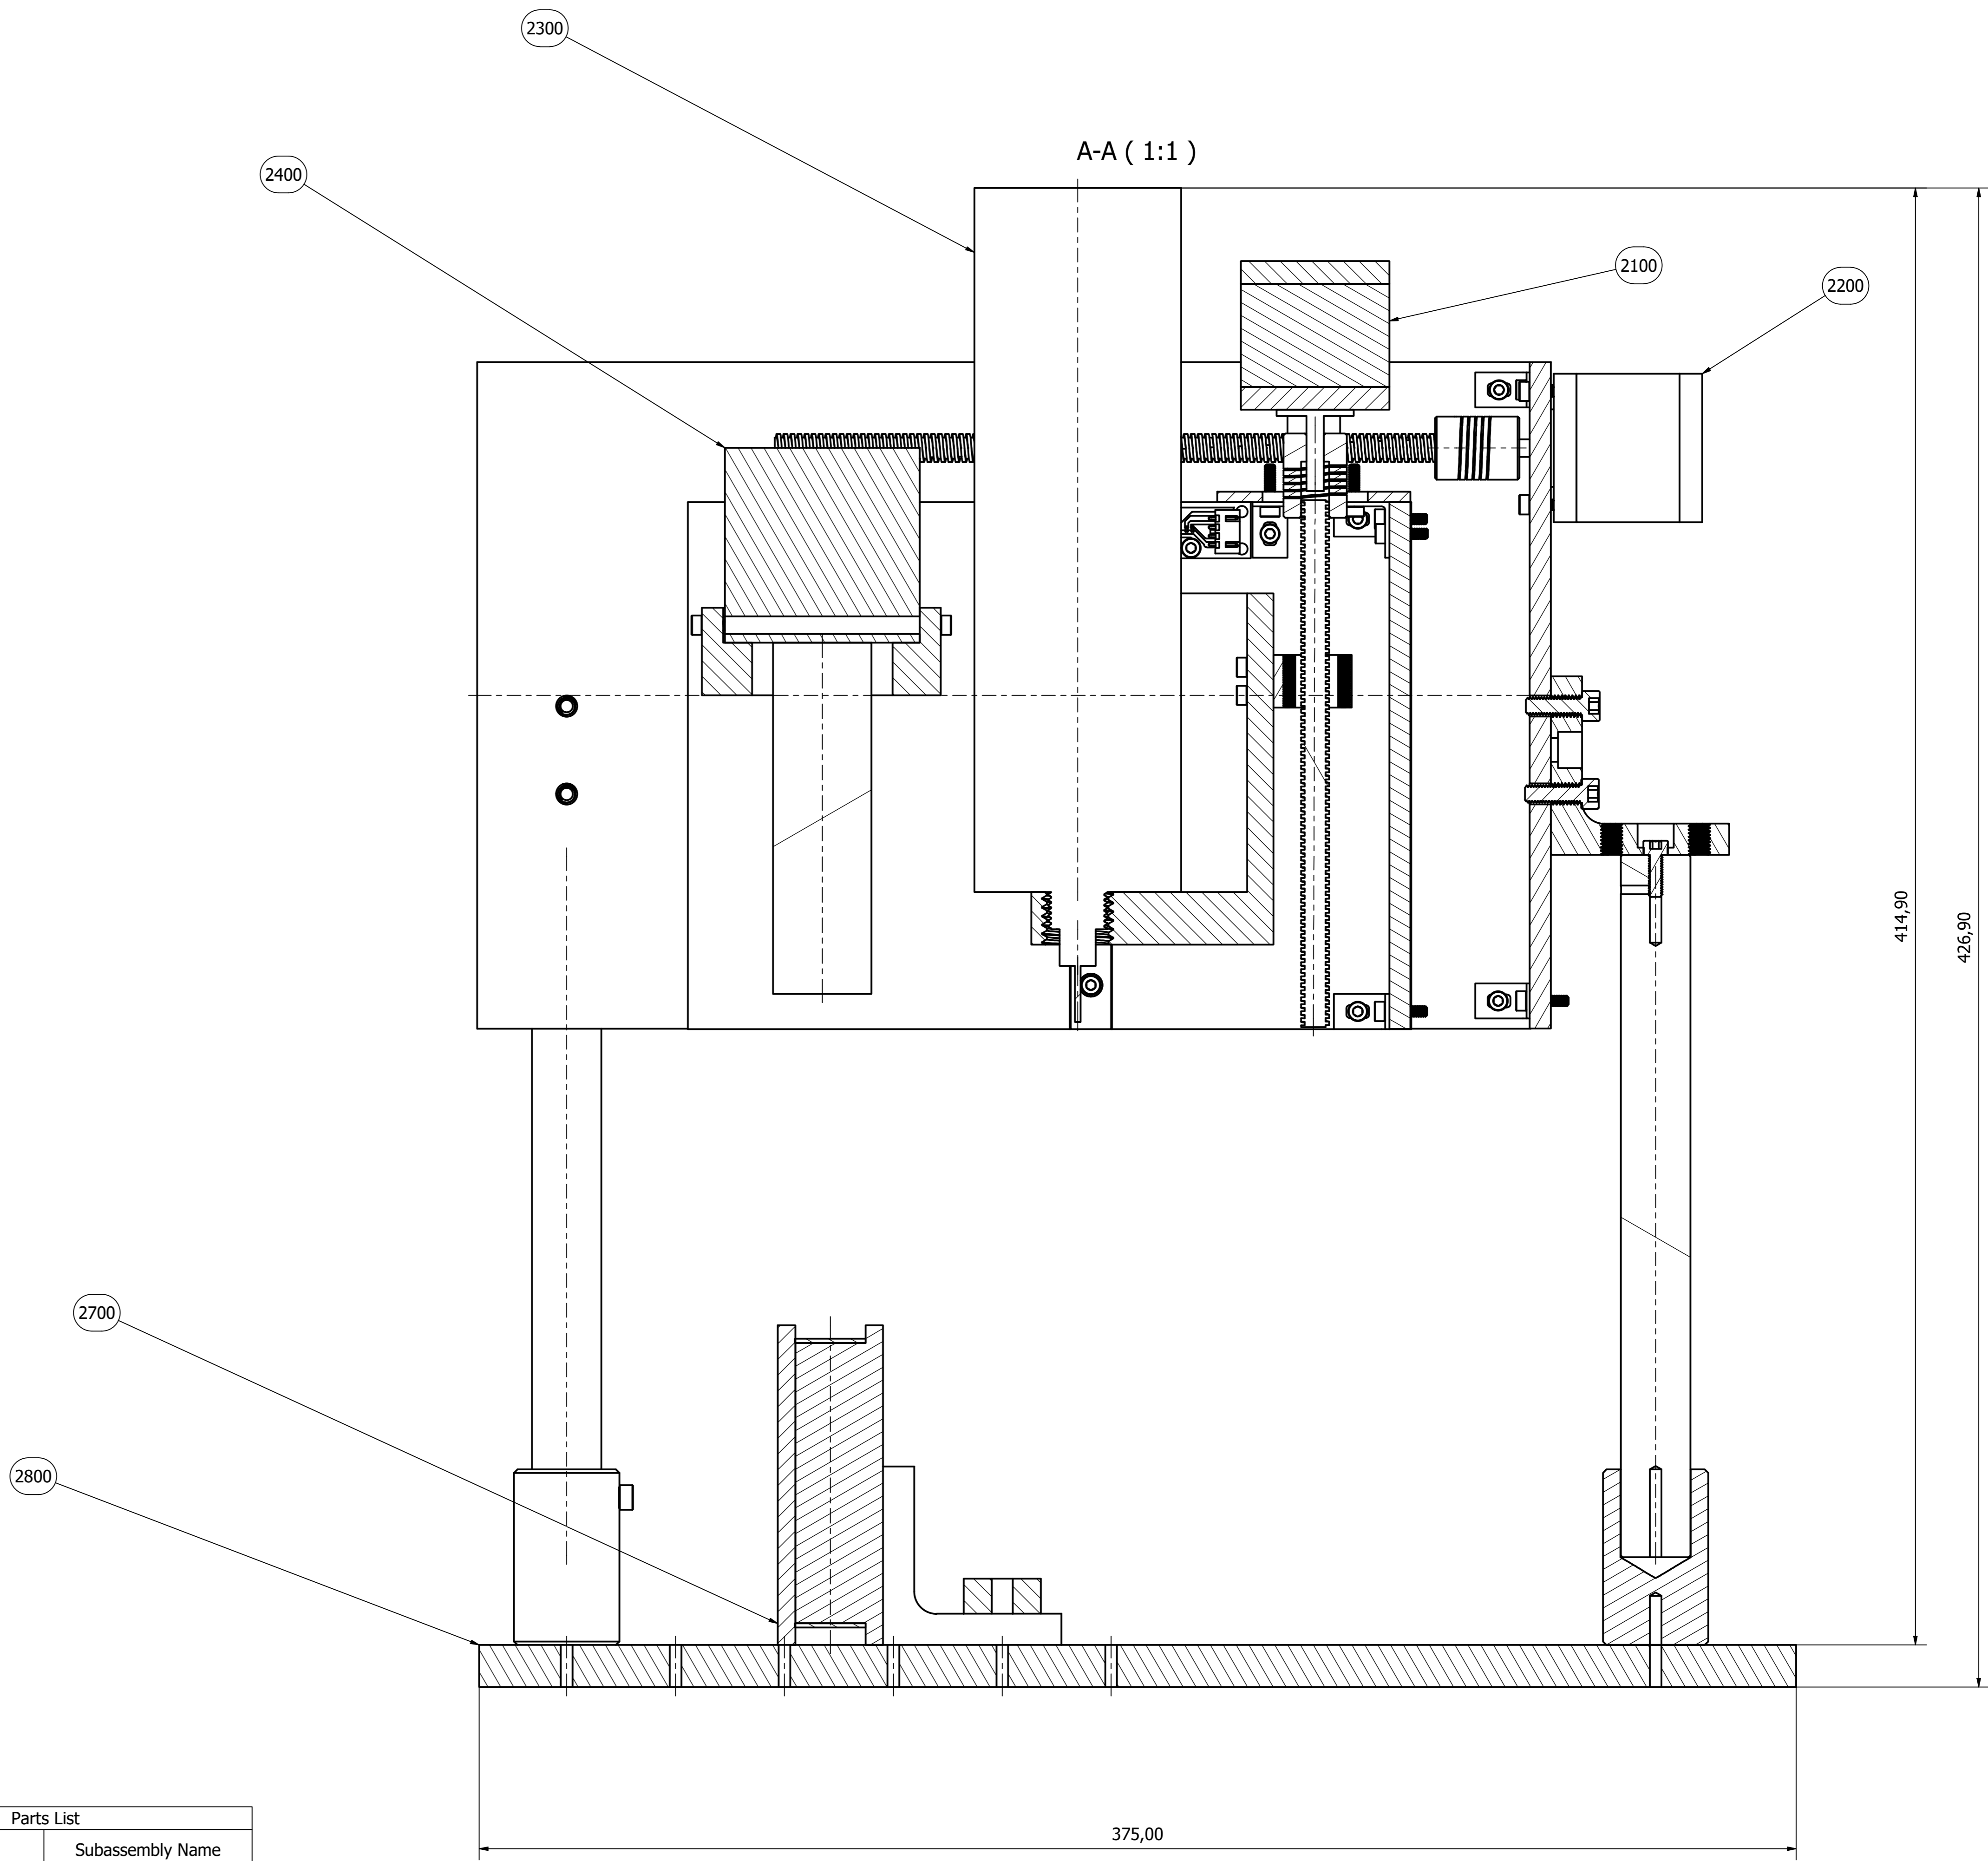

Supplement: s1 [file s1]
