# Supplementary figures and images for: A Novel Low-Cost DIC-Based Residual Stress Measurement Device
Source: MDPI journal article supplement (doi:10.3390/app12147233), 2022-07-18

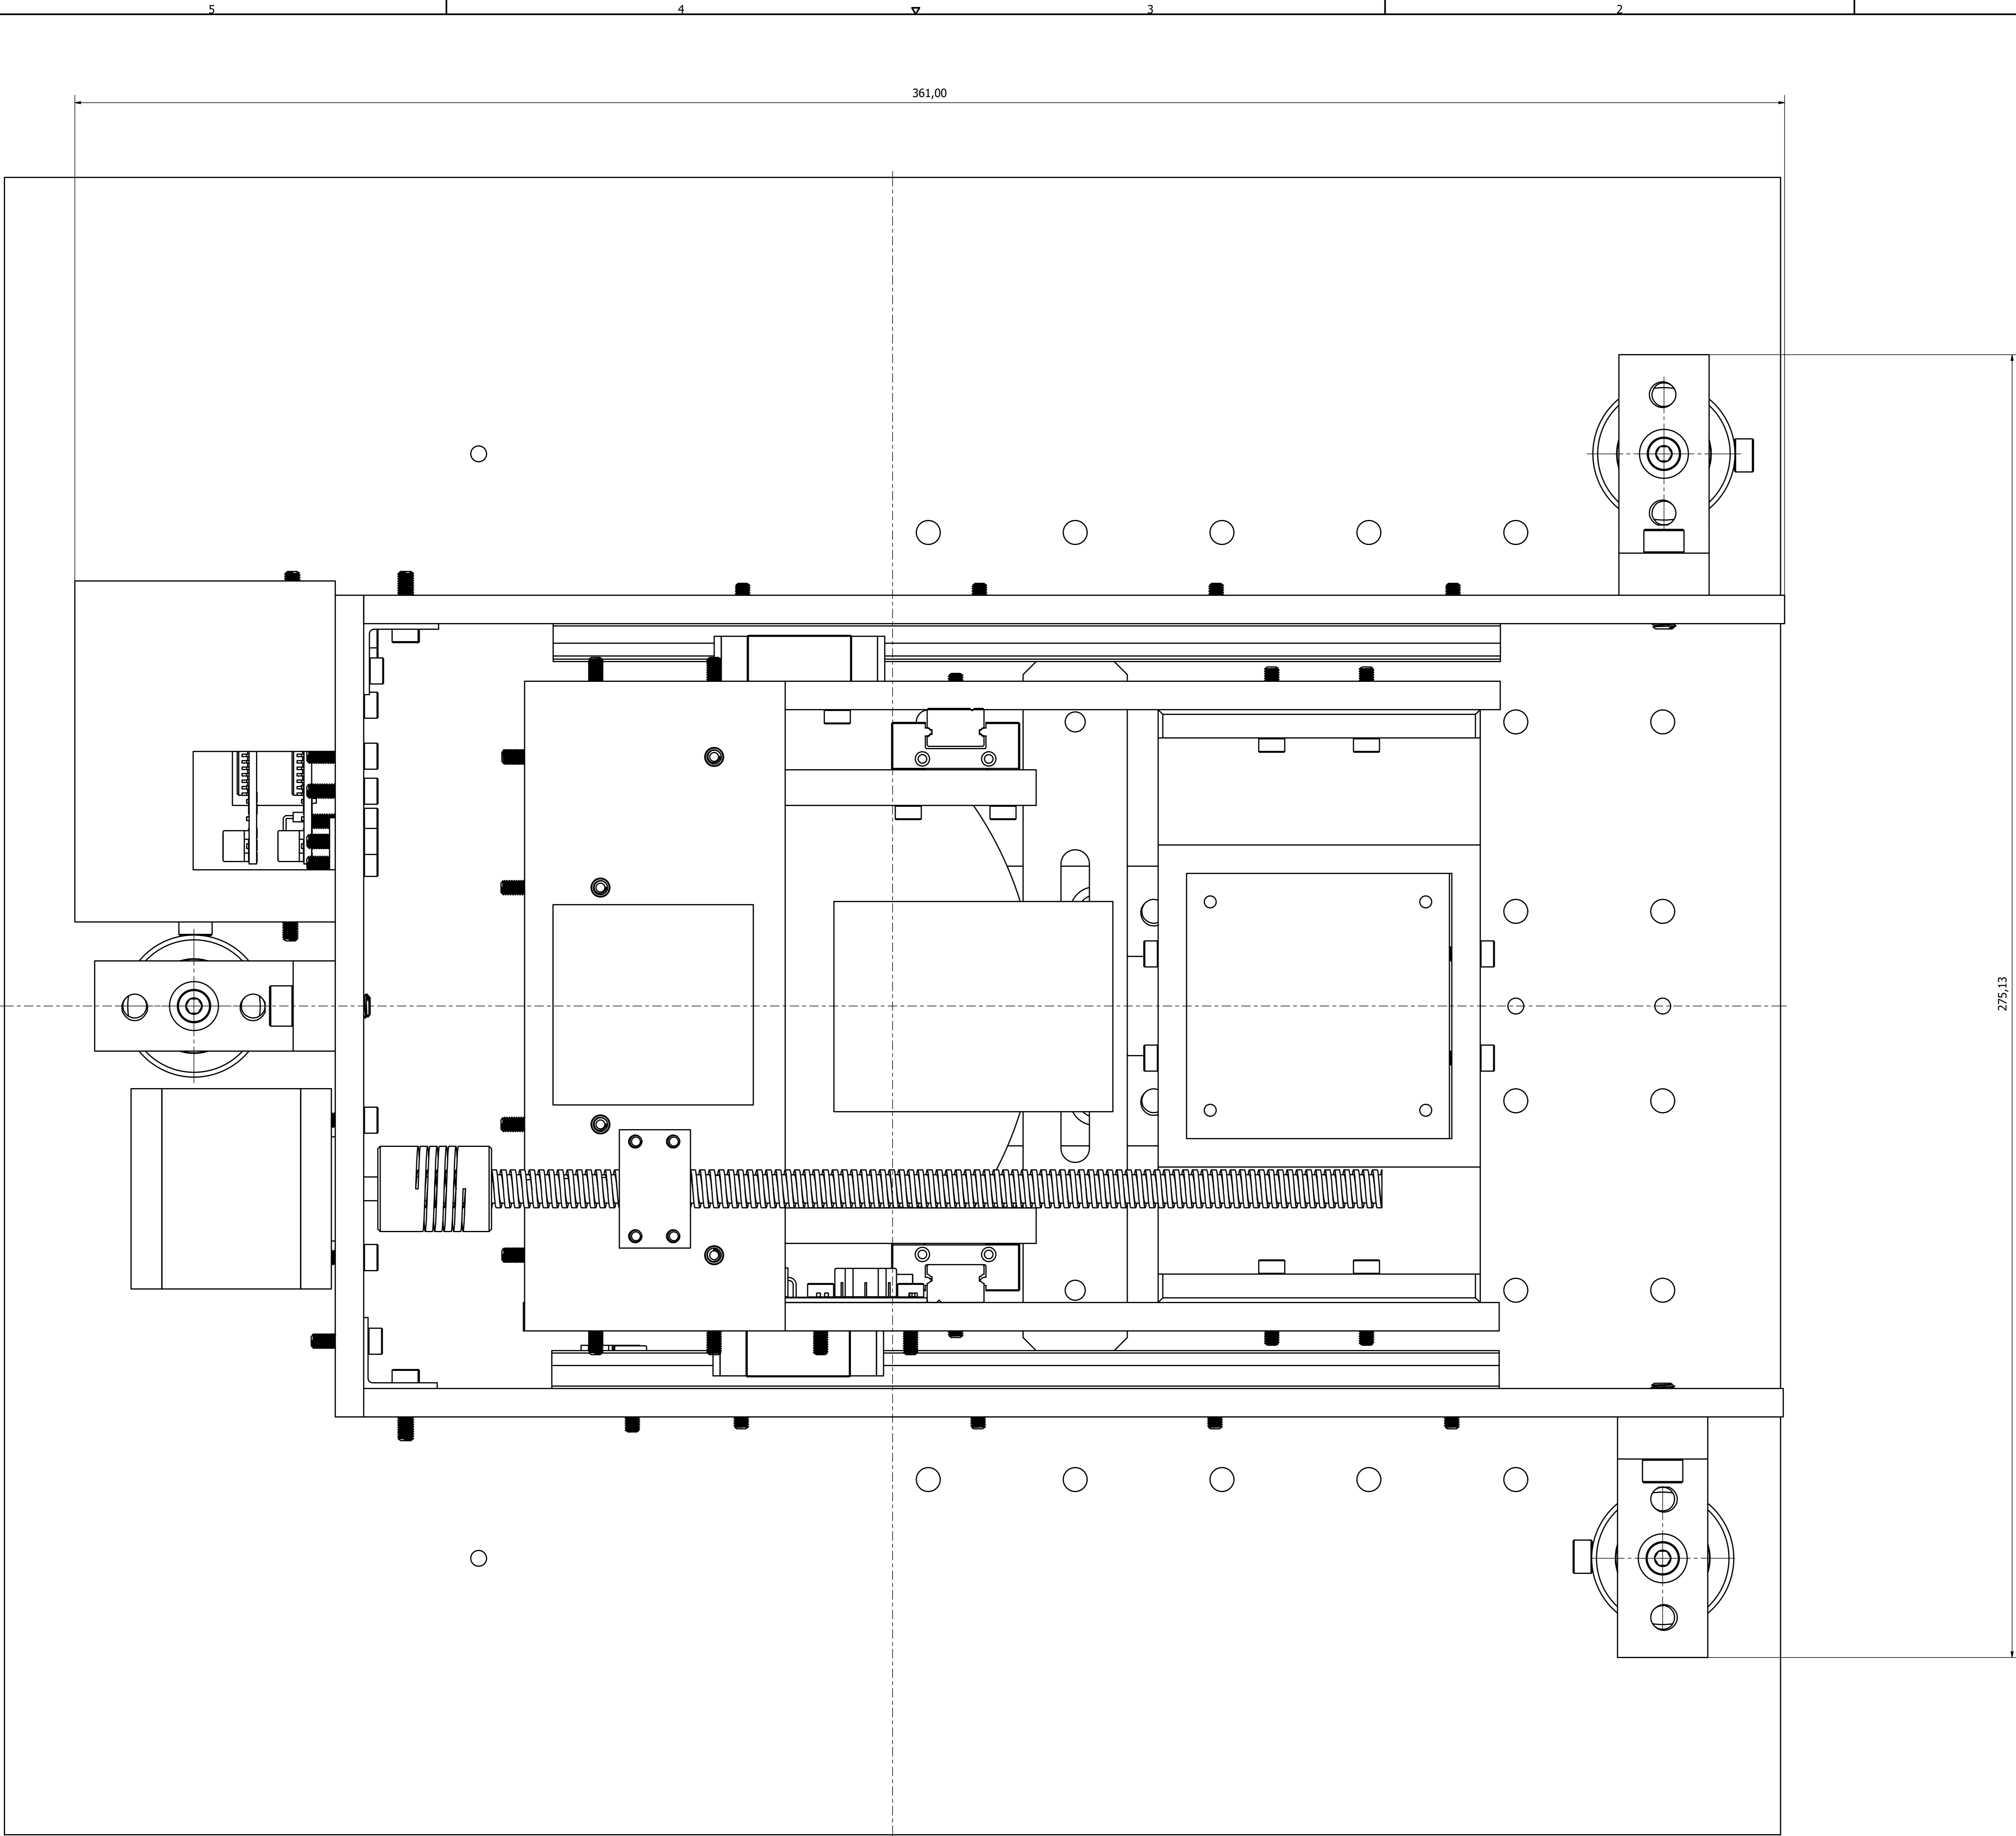

Supplement: s1 [file s1]
